# Supplementary material for: Identification of RPL5 and RPL10 as novel diagnostic biomarkers of Atypical teratoid/rhabdoid tumors
Source: Cancer Cell Int. 2018 Nov 20;18:190. doi: 10.1186/s12935-018-0681-1 (PMC6245545; doi:10.1186/s12935-018-0681-1)
Supplement: Supplementary file 1 — Additional file 1: Table S1. Datasets of the 47 AT/RTs, 31 KRTs, 8 normal brain samples and 23 normal kidney samples. [file 12935_2018_681_MOESM1_ESM.xlsx]

## Sheet: Sheet1
HU133A		HU133Plus2
Kidney_GSM391107	GSE15641	ATRT_GSM1562909	GSE64019
Kidney_GSM391108		ATRT_GSM1562910
Kidney_GSM391109		ATRT_GSM1562911
Kidney_GSM391110		ATRT_GSM1562912
Kidney_GSM391111		ATRT_GSM1562913
Kidney_GSM391112		ATRT_GSM1562914
Kidney_GSM391113		ATRT_GSM1562915
Kidney_GSM391114		ATRT_GSM1562916
Kidney_GSM391115		ATRT_GSM1562917
Kidney_GSM391116		ATRT_GSM1562918
Kidney_GSM391117		ATRT_GSM1562919
Kidney_GSM391118		ATRT_GSM1562920
Kidney_GSM391119		ATRT_GSM1562921
Kidney_GSM391120		ATRT_GSM1562922
Kidney_GSM391121		ATRT_GSM1562923
Kidney_GSM391122		ATRT_GSM1562924
Kidney_GSM391123		ATRT_GSM1562925
Kidney_GSM391124		ATRT_GSM1562926
Kidney_GSM391125		ATRT_GSM1562927
Kidney_GSM391126		ATRT_GSM1562928
Kidney_GSM391127		ATRT_GSM1562929
Kidney_GSM391128		ATRT_GSM1562930
Kidney_GSM391129		ATRT_GSM1562932
RT_GSM289135	GSE11482	ATRT_GSM1562933
RT_GSM289136		ATRT_GSM1562934
RT_GSM289137		ATRT_GSM1562935
RT_GSM289138		ATRT_GSM1562936
RT_GSM289139		ATRT_GSM692982	GSE28026
RT_GSM289140		ATRT_GSM692983
RT_GSM289141		ATRT_GSM692984
RT_GSM289142		ATRT_GSM692985
RT_GSM289143		ATRT_GSM692986
RT_GSM289144		ATRT_GSM692987
RT_GSM767307	GSE30946	ATRT_GSM692988
RT_GSM767308		ATRT_GSM692989
RT_GSM767309		ATRT_GSM692990
RT_GSM767310		ATRT_GSM692991
RT_GSM767311		ATRT_GSM692992
RT_GSM767312		ATRT_GSM692993
RT_GSM767313		ATRT_GSM692994
RT_GSM767314		ATRT_GSM692995
RT_GSM767315		ATRT_GSM692996
RT_GSM767316		ATRT_GSM692997
		ATRT_GSM692998
		ATRT_GSM692999
		ATRT_GSM982838	GSE35493
		ATRT_GSM982839
		RT_GSM1562893	GSE64019
		RT_GSM1562905
		RT_GSM1562908
		RT_GSM1727598	GSE70421
		RT_GSM1727599
		RT_GSM1727600
		RT_GSM1727602
		RT_GSM1727603
		RT_GSM1727604
		RT_GSM1727605
		RT_GSM1727607
		Cerebellum_GSM869707	GSE35493
		Cerebellum_GSM982850
		Occipital_GSM982847
		Occipital_GSM982851
		Parietal_GSM982848
		Parietal_GSM982852
		Temporal_GSM982849
		Temporal_GSM982853
